# Supplementary material for: Just add water to split water: ultrahigh-performance bifunctional electrocatalysts fabricated using eco-friendly heterointerfacing of NiCo diselenides
Source: Royal Society of Chemistry journal article supplement (doi:10.1039/d0ta02121k), 2020-01-01
Supplement: d0ta02121k1.pdf [file d0ta02121k1.pdf]

## Electronic Supplementary Information

Just add water to split water: ultra-high-performance bifunctional electrocatalyst by eco-friendly heterointerfacing Ni-Co diselenides

Dongliang Chen,<sup>a</sup> Zhenmiao Xu,<sup>a</sup> Wei Chen,<sup>b</sup> Guangliang Chen,<sup>\*a</sup> Jun Huang,<sup>\*b,c</sup> Changsheng Song,<sup>\*a</sup> Chaorong Li<sup>a</sup> and Kostya (Ken) Ostrikov<sup>c,d</sup>

<sup>a</sup>School of Materials Science and Engineering, Zhejiang Sci-Tech University, Hangzhou 310018, China

\*E-mail: glchen@zstu.edu.cn; cssong@zstu.edu.cn

<sup>b</sup>School of Physics and Electronic Information, Gannan Normal University, Ganzhou, Jiangxi 341000, China

\*E-mail: junhuang66@163.com

<sup>c</sup>School of Chemistry and Physics, Queensland University of Technology, Brisbane, QLD 4000, Australia

<sup>d</sup>Centre for Materials Science, Queensland University of Technology, Brisbane, QLD 4000, Australia

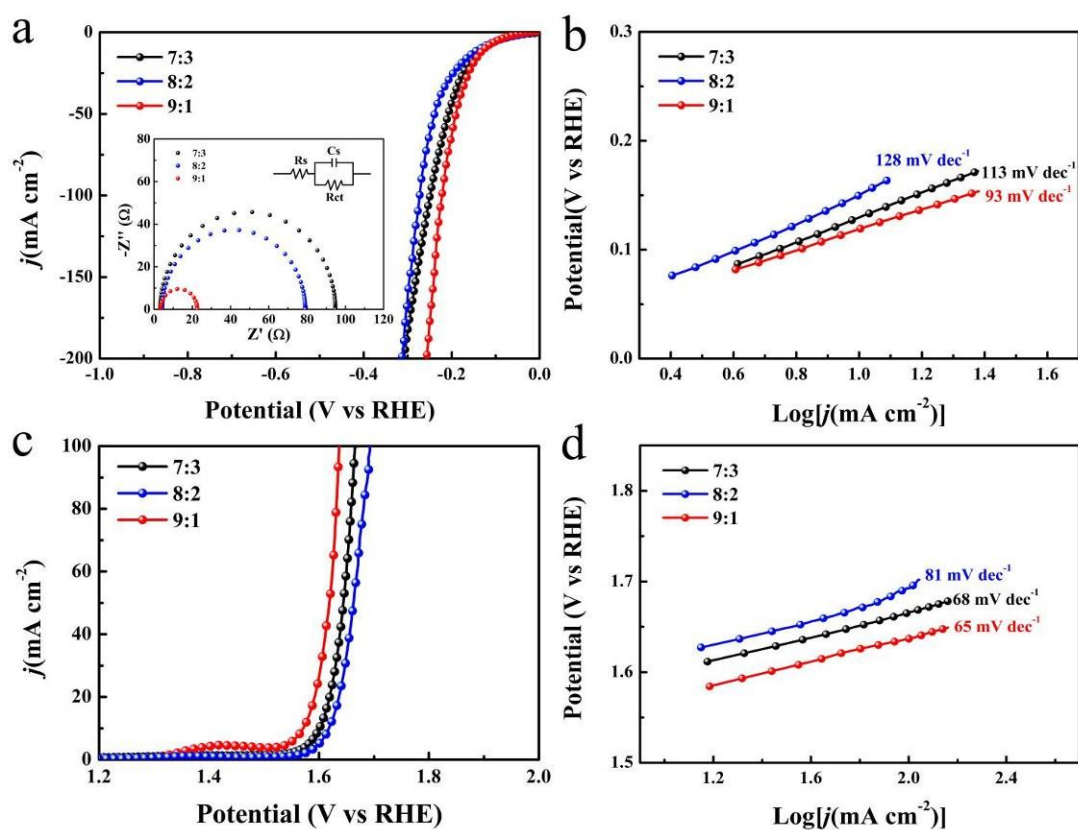

**Figure S1.** The effects of different Ni/Co alloy ratio on the HER and OER activity of the in-situ fabricated NiCo LDH/NCF. (a) Polarization curves in 1 M KOH for the HER with a scan rate of 1 mV s<sup>-1</sup> and the insert is the corresponding Nyquist plots, (b) The Tafel plots corresponding to HER polarization curves, (c) Polarization curves in 1 M KOH for the OER with a scan rate of 1 mV s<sup>-1</sup>, and (d) The Tafel plots corresponding to OER polarization curves.

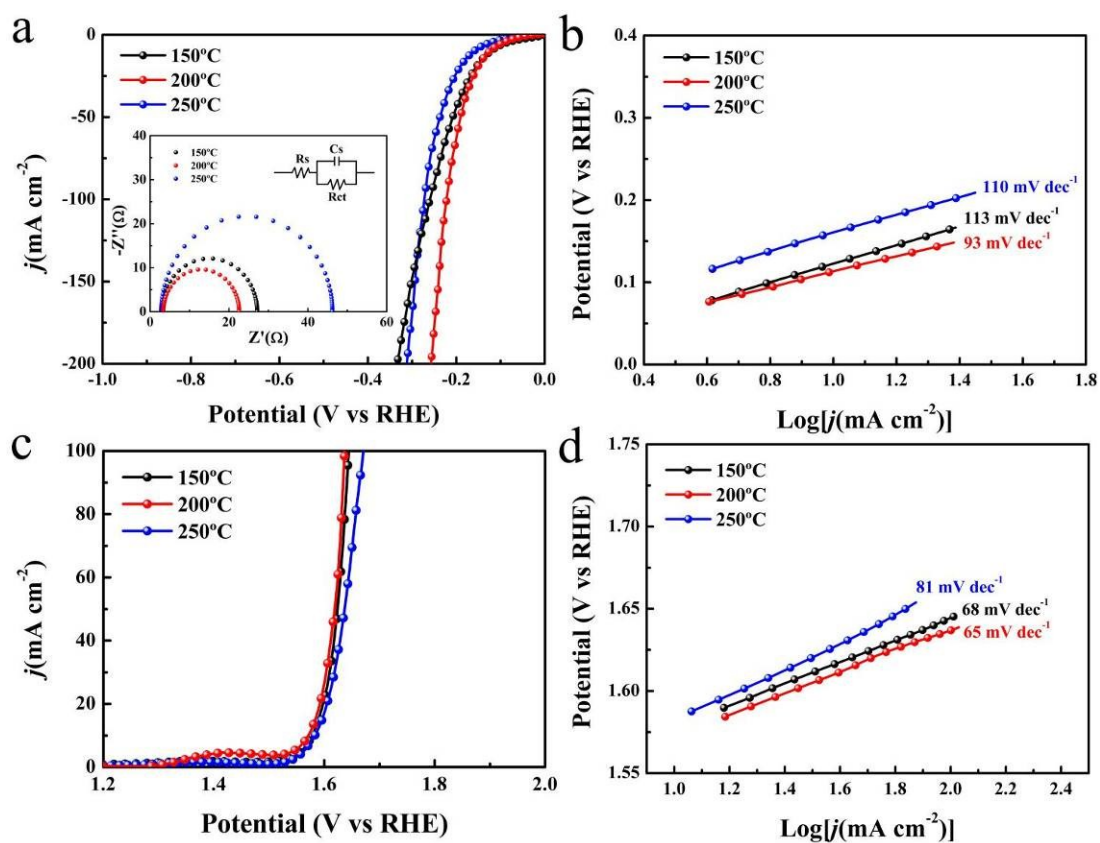

**Figure S2.** The HER and OER performances of in-situ NiCo LDH/NCF fabricated with different reaction temperature. (a) Polarization curves in 1 M KOH for the HER with a scan rate of 1 mV s<sup>-1</sup>, and the insert is the corresponding Nyquist plots, (b) The Tafel plots corresponding to HER polarization curves, (c) Polarization curves in 1 M KOH for the OER with a scan rate of 1 mV s<sup>-1</sup>, (d) The Tafel plots corresponding to OER polarization curves.

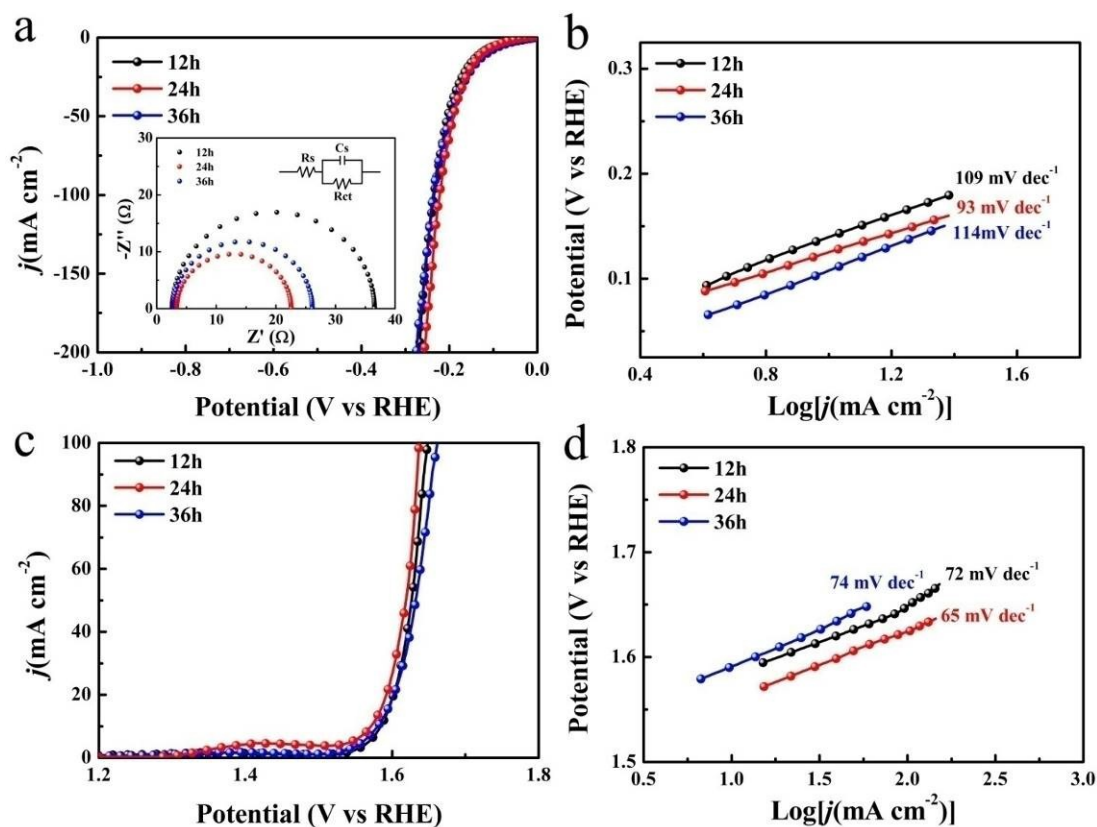

**Figure S3.** The HER and OER performances of in-situ NiCo LDH/NCF fabricated with different reaction time. (a) Polarization curves in 1 M KOH for the HER with a scan rate of 1 mV s<sup>-1</sup> and the insert is the corresponding Nyquist plots, (b) The Tafel plots corresponding to HER polarization curves, (c) Polarization curves in 1 M KOH for the OER with a scan rate of 1 mV s<sup>-1</sup> and (d) The Tafel plots corresponding to OER polarization curves.

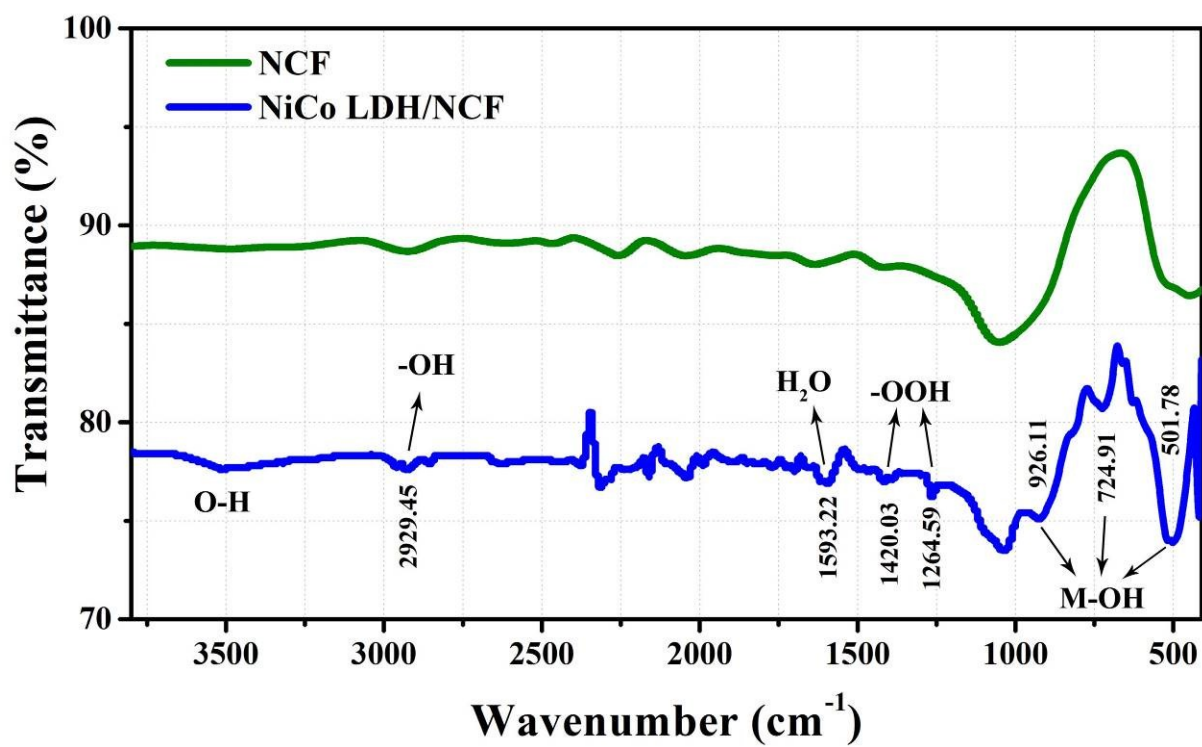

Figure S4. The FTIR spectrum of NiCo LDH sprouted from NCF surface.

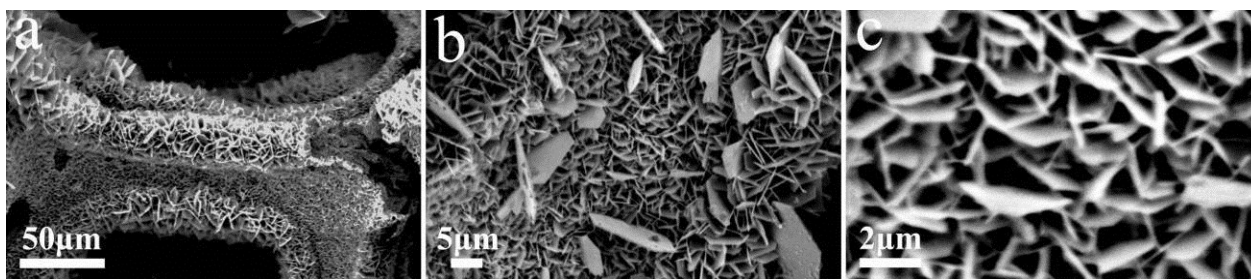

**Figure S5.** The SEM images of in-situ NiCo LDH/NCF fabricated with optimized reaction conditions. (a) and (b) Low resolution SEM image, and (c) High resolution SEM image.

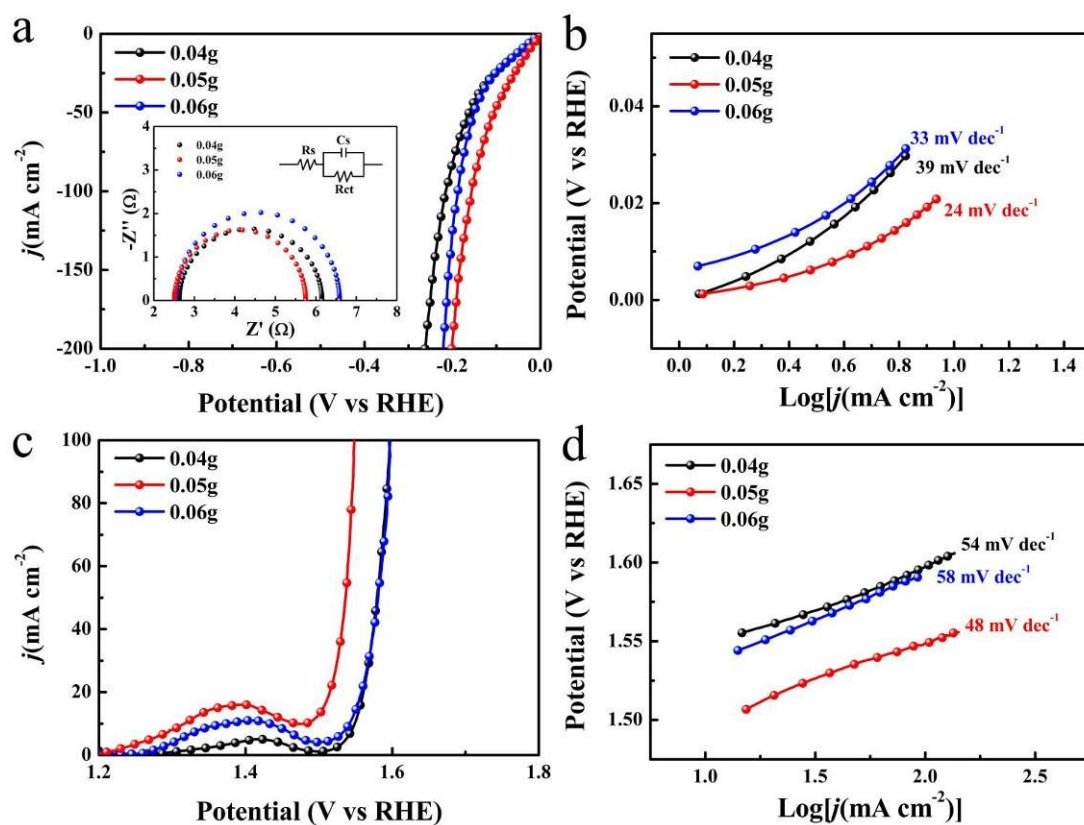

**Figure S6.** The effects of selenium powder amount on the HER and OER activity during selenization. (a) Polarization curves in 1 M KOH for the HER with a scan rate of 1 mV s<sup>-1</sup> and the insert is the corresponding Nyquist plots, (b) The Tafel plots corresponding to HER polarization curves, (c) Polarization curves in 1 M KOH for the OER with a scan rate of 1 mV s<sup>-1</sup> and (d) The Tafel plots corresponding to OER polarization curves.

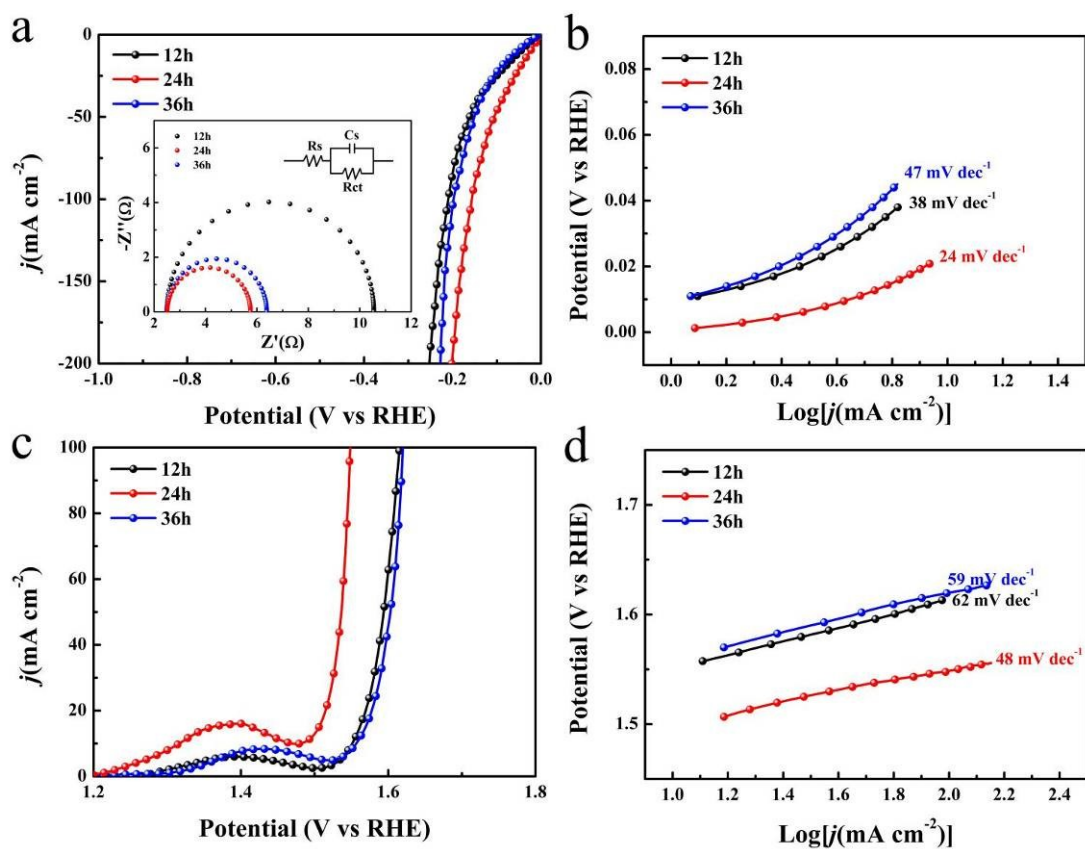

**Figure S7.** The HER and OER performances of NiSe<sub>2</sub>-CoSe<sub>2</sub>/NCF based on the in-situ NiCo LDH/NCF fabricated with different reaction time. (a) Polarization curves in 1 M KOH for the HER with a scan rate of 1 mV s<sup>-1</sup> and the insert is the corresponding Nyquist plots, (b) The Tafel plots corresponding to HER polarization curves, (c) Polarization curves in 1 M KOH for the OER with a scan rate of 1 mV s<sup>-1</sup> and (d) The Tafel plots corresponding to OER polarization curves.



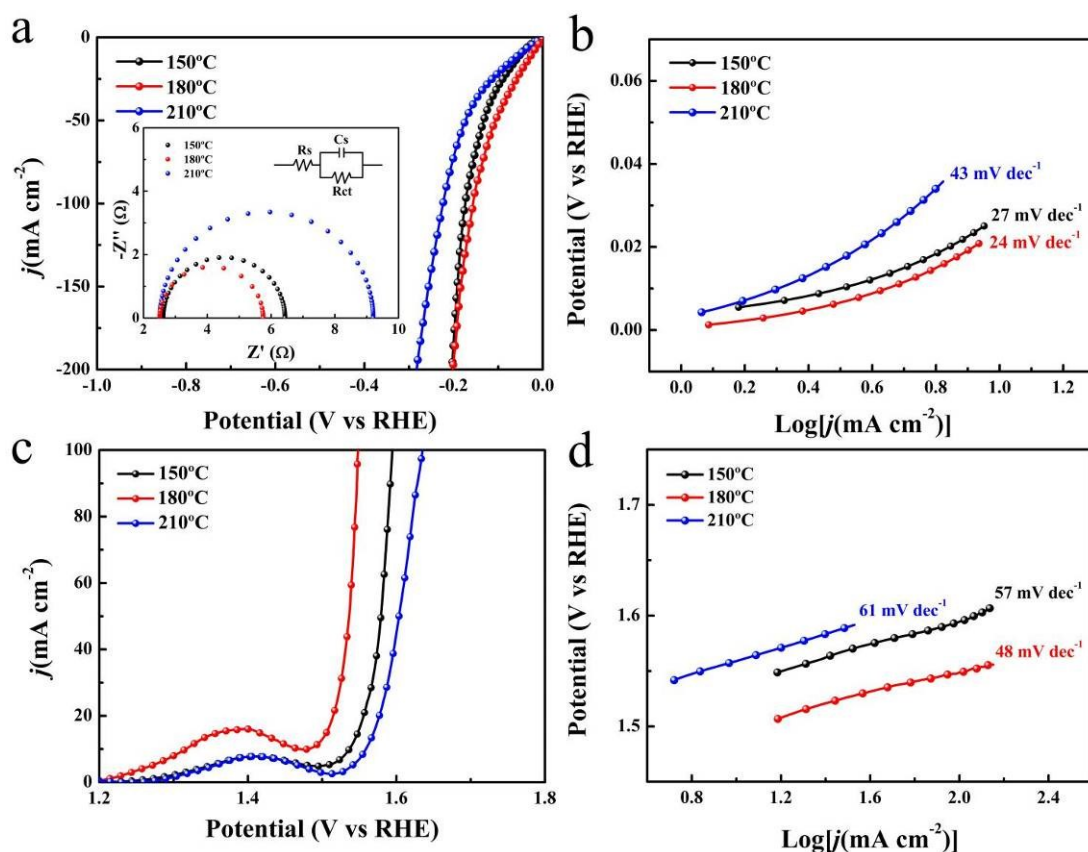

**Figure S8.** The HER and OER performances of NiSe<sub>2</sub>-CoSe<sub>2</sub>/NCF based on the in-situ NiCo LDH/NCF fabricated with different reaction temperature. (a) Polarization curves in 1 M KOH for the HER with a scan rate of 1 mV s<sup>-1</sup> and the insert is the corresponding Nyquist plots, (b) The Tafel plots corresponding to HER polarization curves, (c) Polarization curves in 1 M KOH for the OER with a scan rate of 1 mV s<sup>-1</sup> and (d) The Tafel plots corresponding to OER polarization curves.

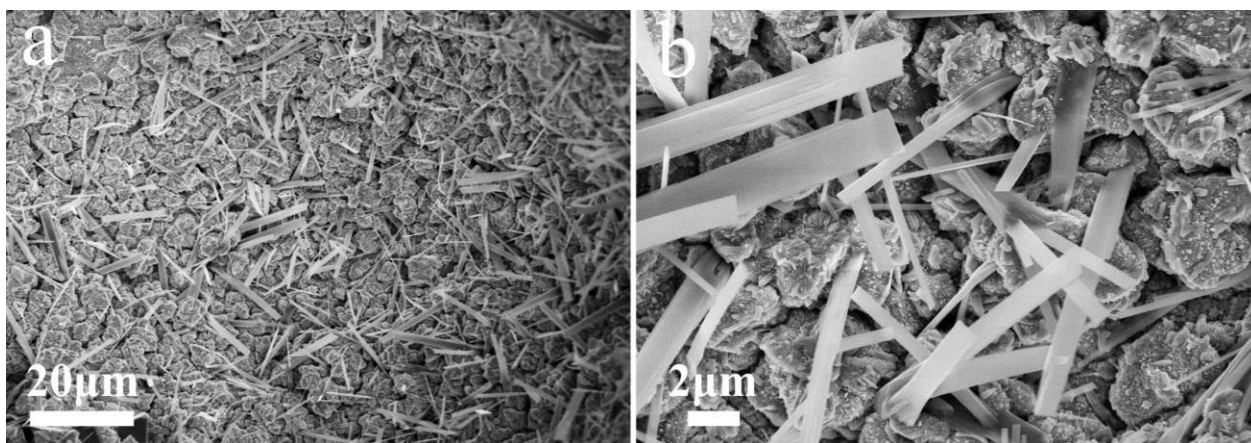

**Figure S9.** The SEM images of NiCoSe<sub>2</sub>/NCF without the in-situ hydrothermal treatment. (a) Low resolution SEM image and (b) High resolution SEM image.

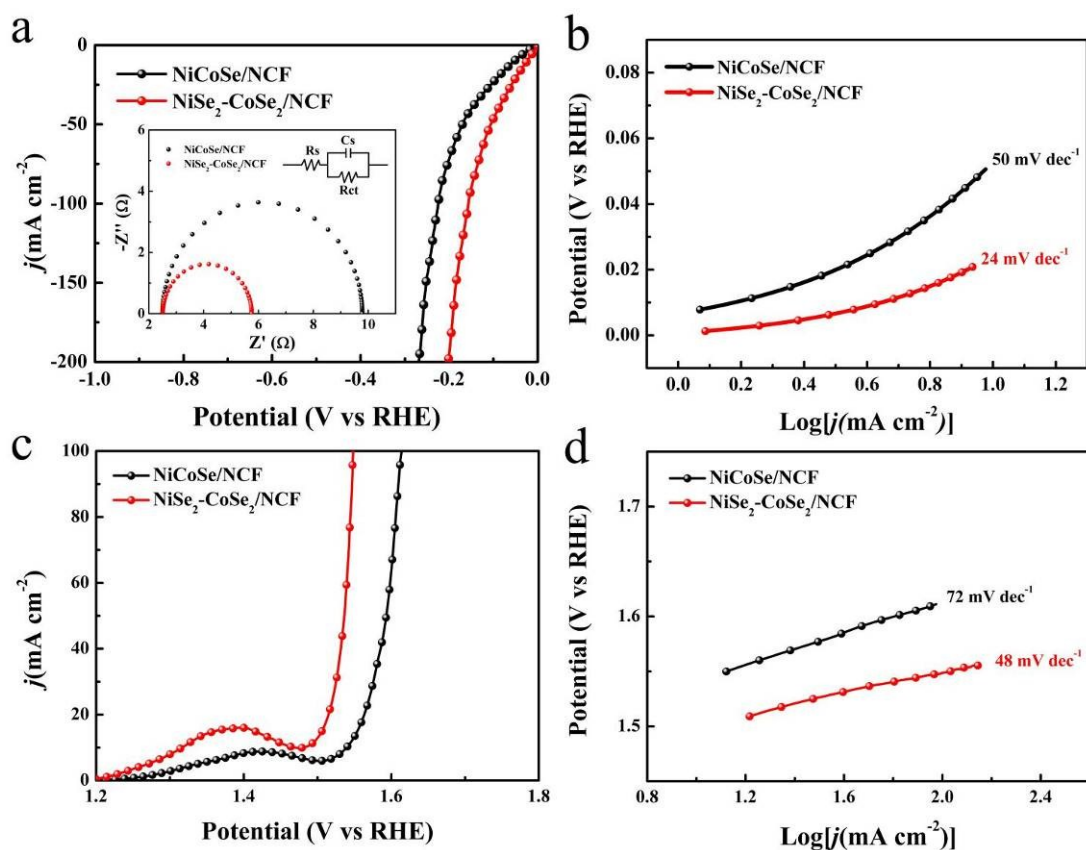

**Figure S10.** The effects of in-situ hydrothermal treatment on the HER and OER activity of the nickel-cobalt selenides. (a) Polarization curves in 1 M KOH for the HER with a scan rate of 1 mV s<sup>-1</sup> and the insert is the corresponding Nyquist plots, (b) The Tafel plots corresponding to HER polarization curves, (c) Polarization curves in 1 M KOH for the OER with a scan rate of 1 mV s<sup>-1</sup>, and (d) The Tafel plots corresponding to OER polarization curves.

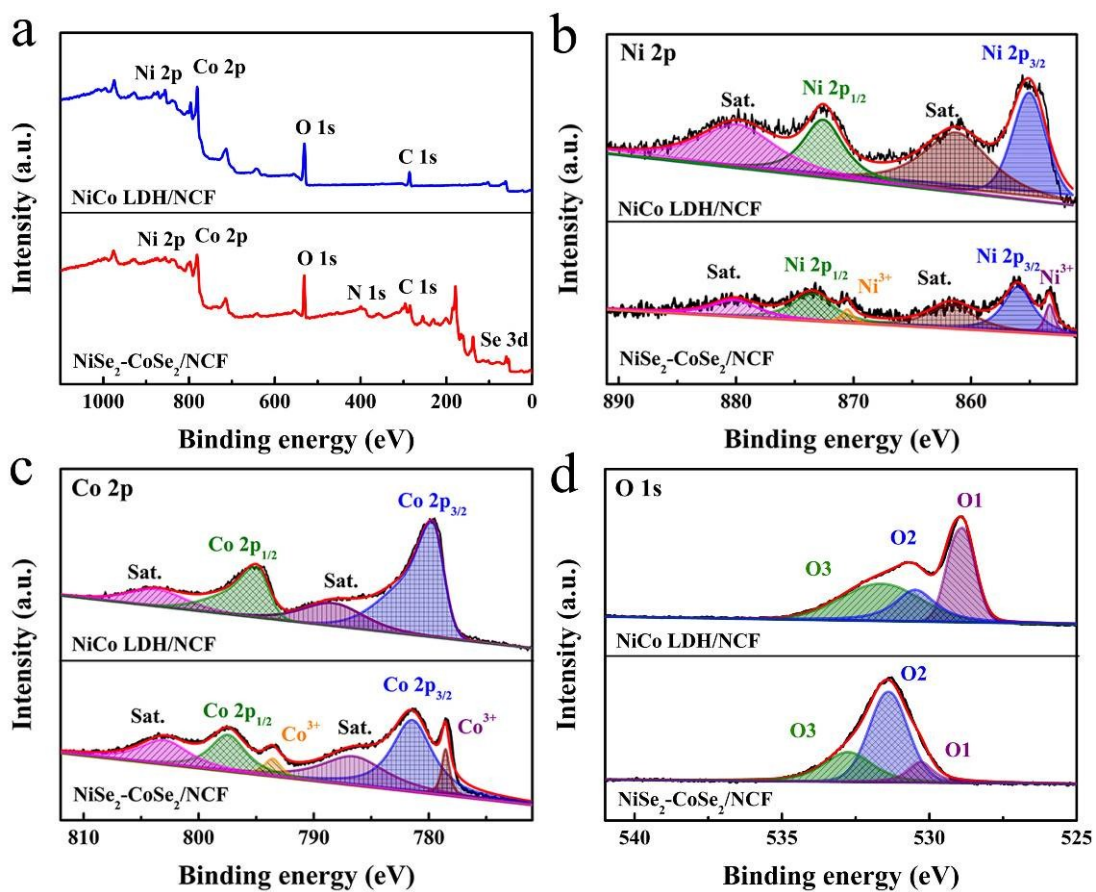

**Figure S11.** High resolution XPS spectra of NiCo LDH/NCF and NiSe<sub>2</sub>-CoSe<sub>2</sub>/NCF. (a) The whole spectra, (b) Ni 2p, (c) Co 2p, and (d) O 1s.

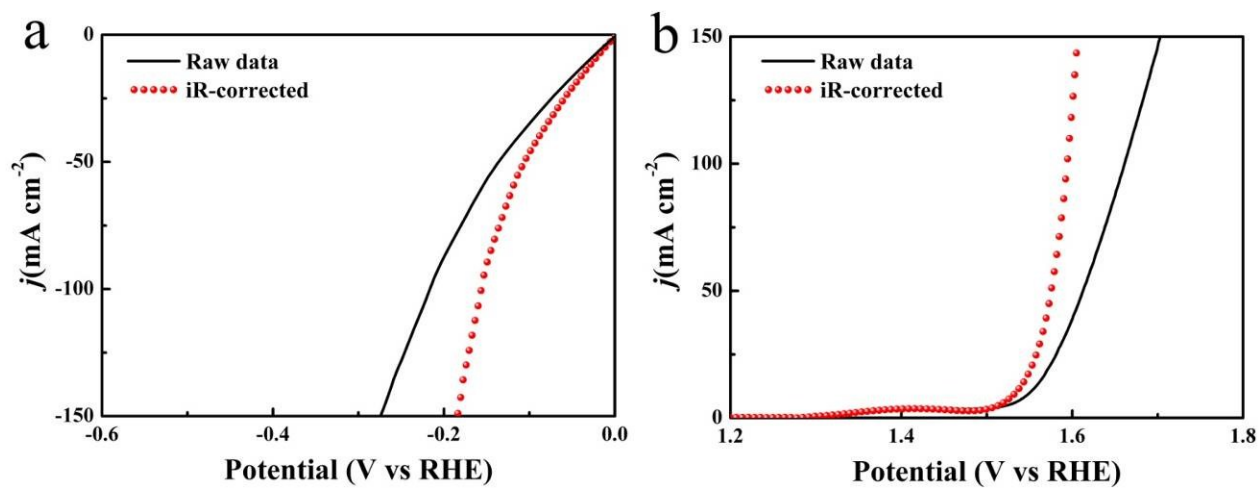

**Figure S12.** The Polarization curves in 1 M KOH before iR-corrected of NiSe<sub>2</sub>-CoSe<sub>2</sub>/NCF. (a) The LSV curves for the HER with a scan rate of 1 mV s<sup>-1</sup>, and (b) The LSV curves for the OER with a scan rate of 1 mV s<sup>-1</sup>.

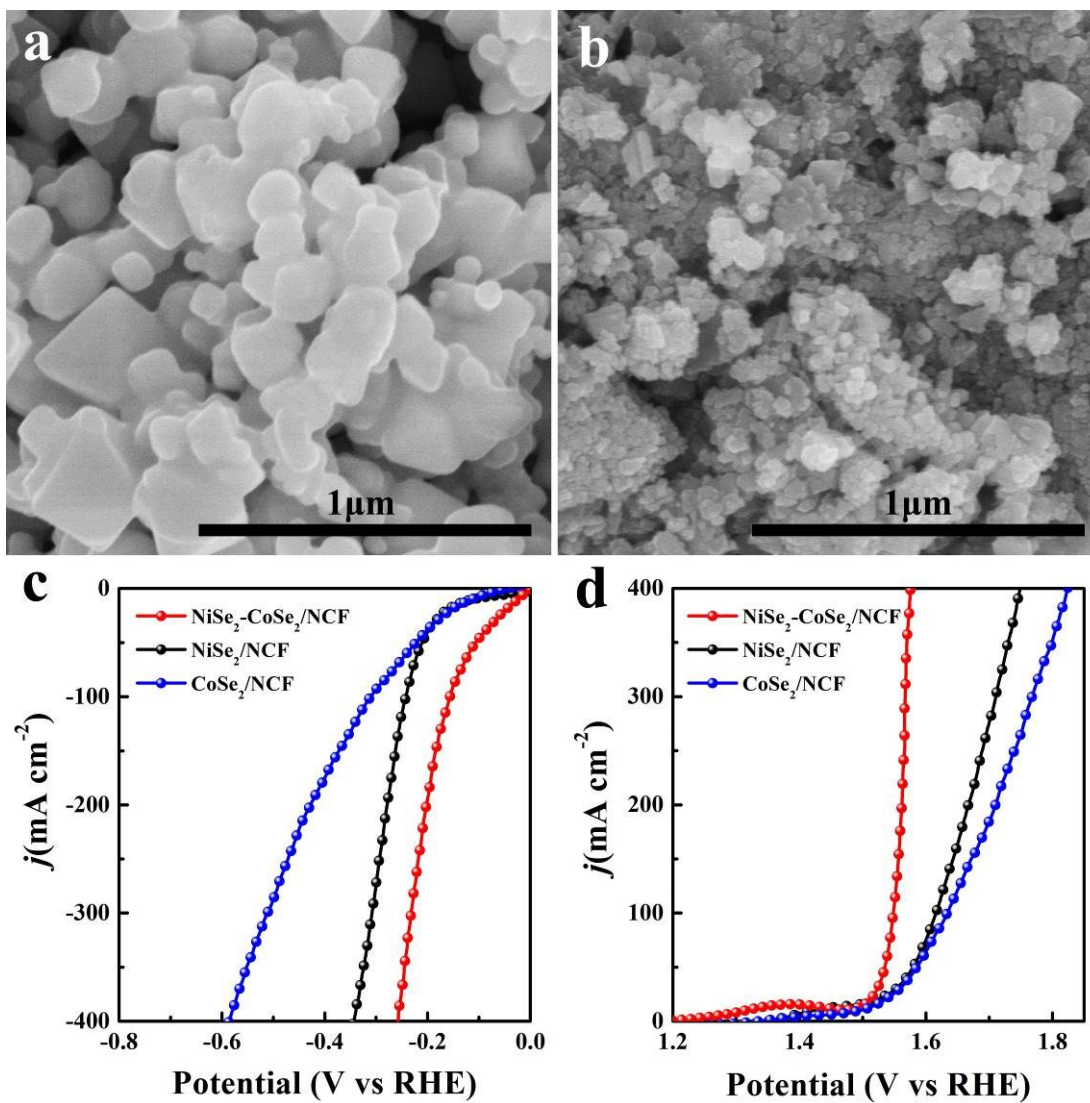

**Figure S13.** The HER and OER performances of NiSe<sub>2</sub>/NCF and CoSe<sub>2</sub>/NCF catalysts.

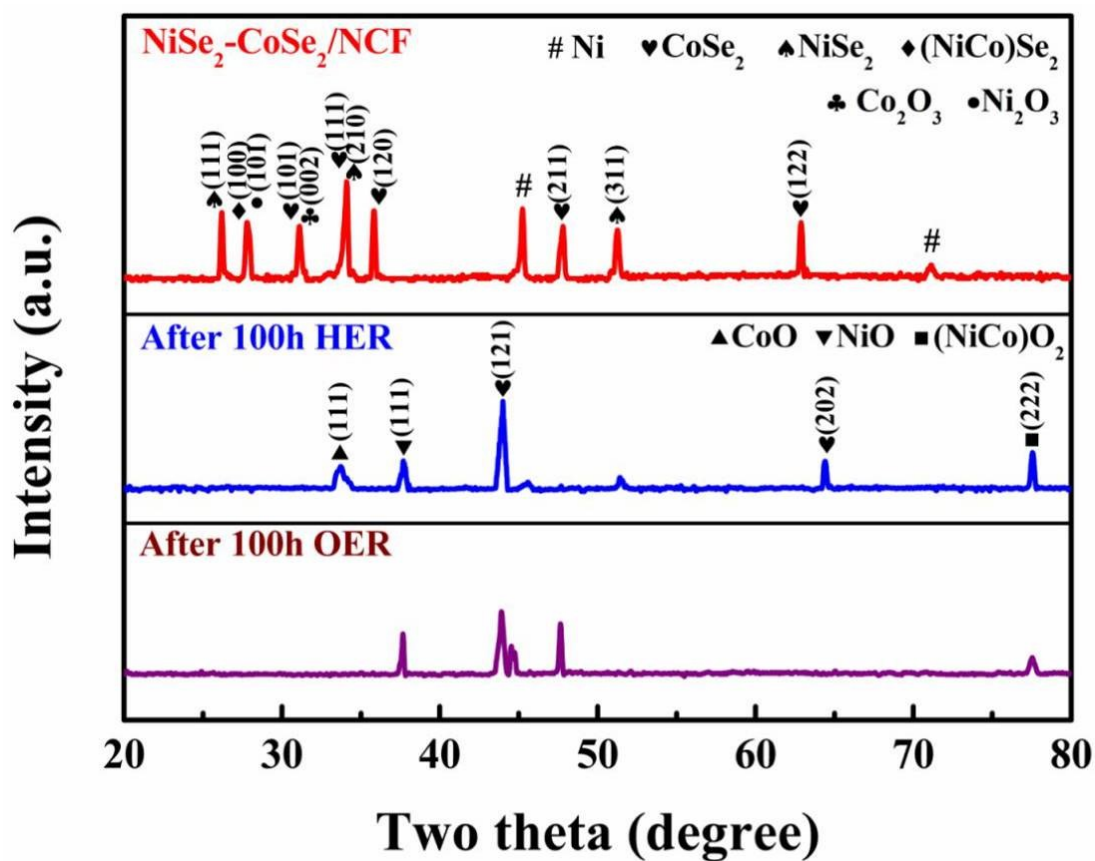

**Figure S14.** The XRD patterns of the  $\text{NiSe}_2\text{-CoSe}_2/\text{NCF}$  catalysts after the long-term HER and OER processes in 1 M KOH solution at  $10 \text{ mA cm}^{-2}$  for 100 hours.

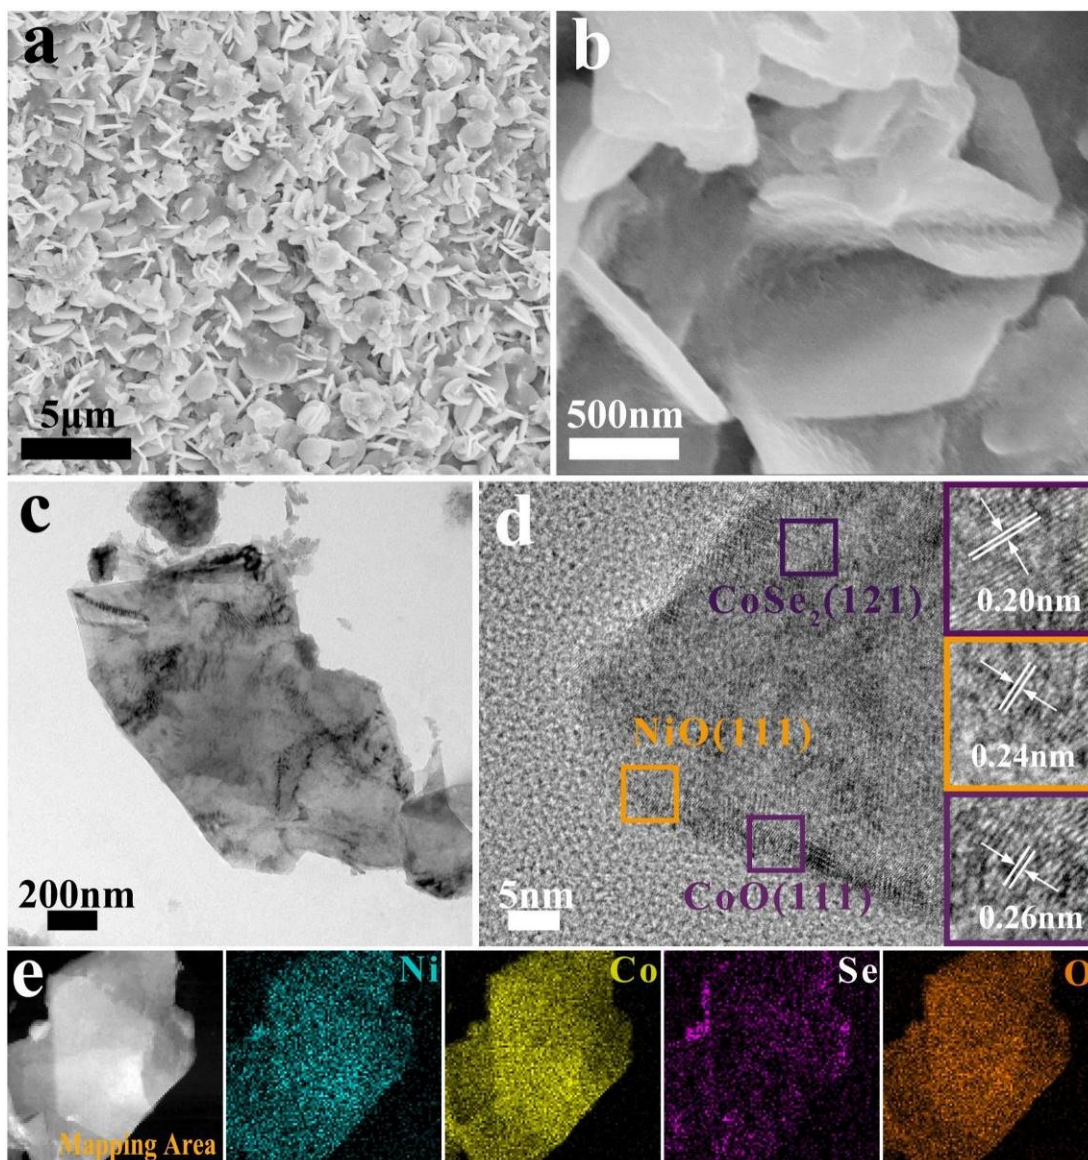

**Figure S15.** The morphology and crystal structures of NiSe<sub>2</sub>-CoSe<sub>2</sub>/NCF samples undergoing a HER process in 1 M KOH solution with  $j_{10}$  for 100 h. (a) Low and (b) High resolution SEM, (c) TEM image of NiSe<sub>2</sub>-CoSe<sub>2</sub>/NCF nanosheet, (d) High resolution TEM image, and (e) The elements mapping of a single nanosheet.



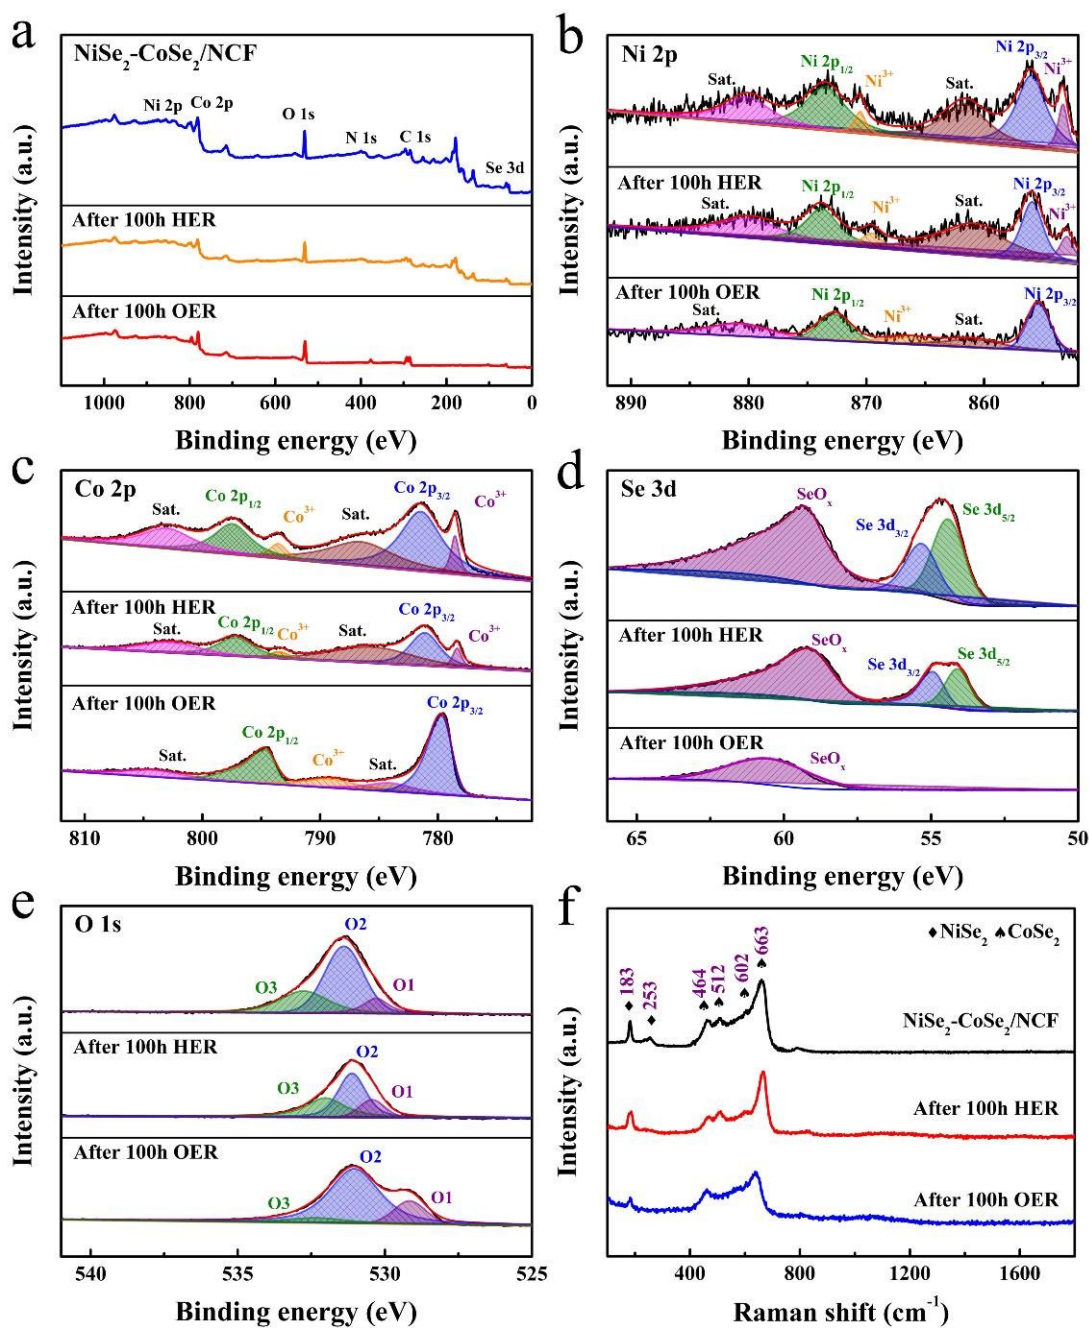

**Figure S16.** High resolution XPS spectra and the Raman spectra of the NiSe<sub>2</sub>-CoSe<sub>2</sub>/NCF undergoing the HER and the OER process in 1 M KOH at  $j_{10}$  for 100 h, respectively. (a) The whole spectra, (b) Ni 2p, (c) Co 2p, (d) Se 3d, (e) O 1s, and (f) Raman spectra.

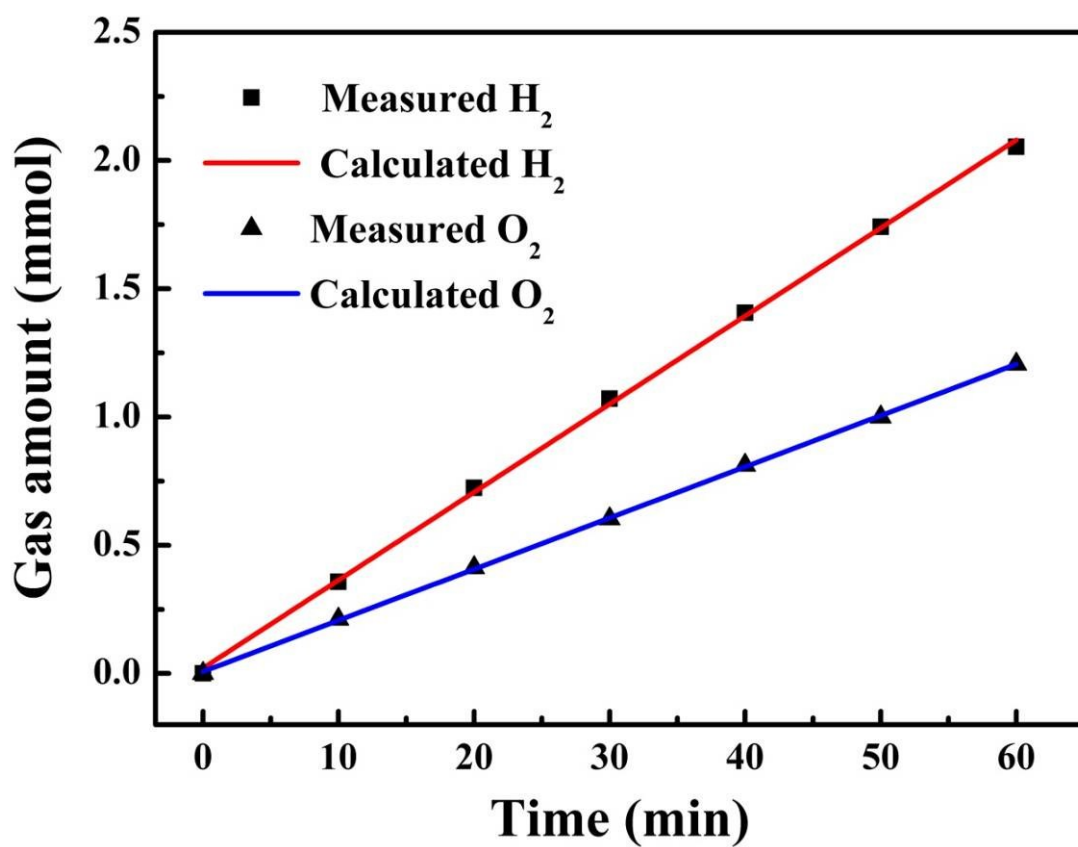

**Figure S17.** Amounts of gas collected and calculated from the electron quantity of NiSe<sub>2</sub>-CoSe<sub>2</sub>/NCF during water splitting, pushing with a current density of  $j_{10}$ .

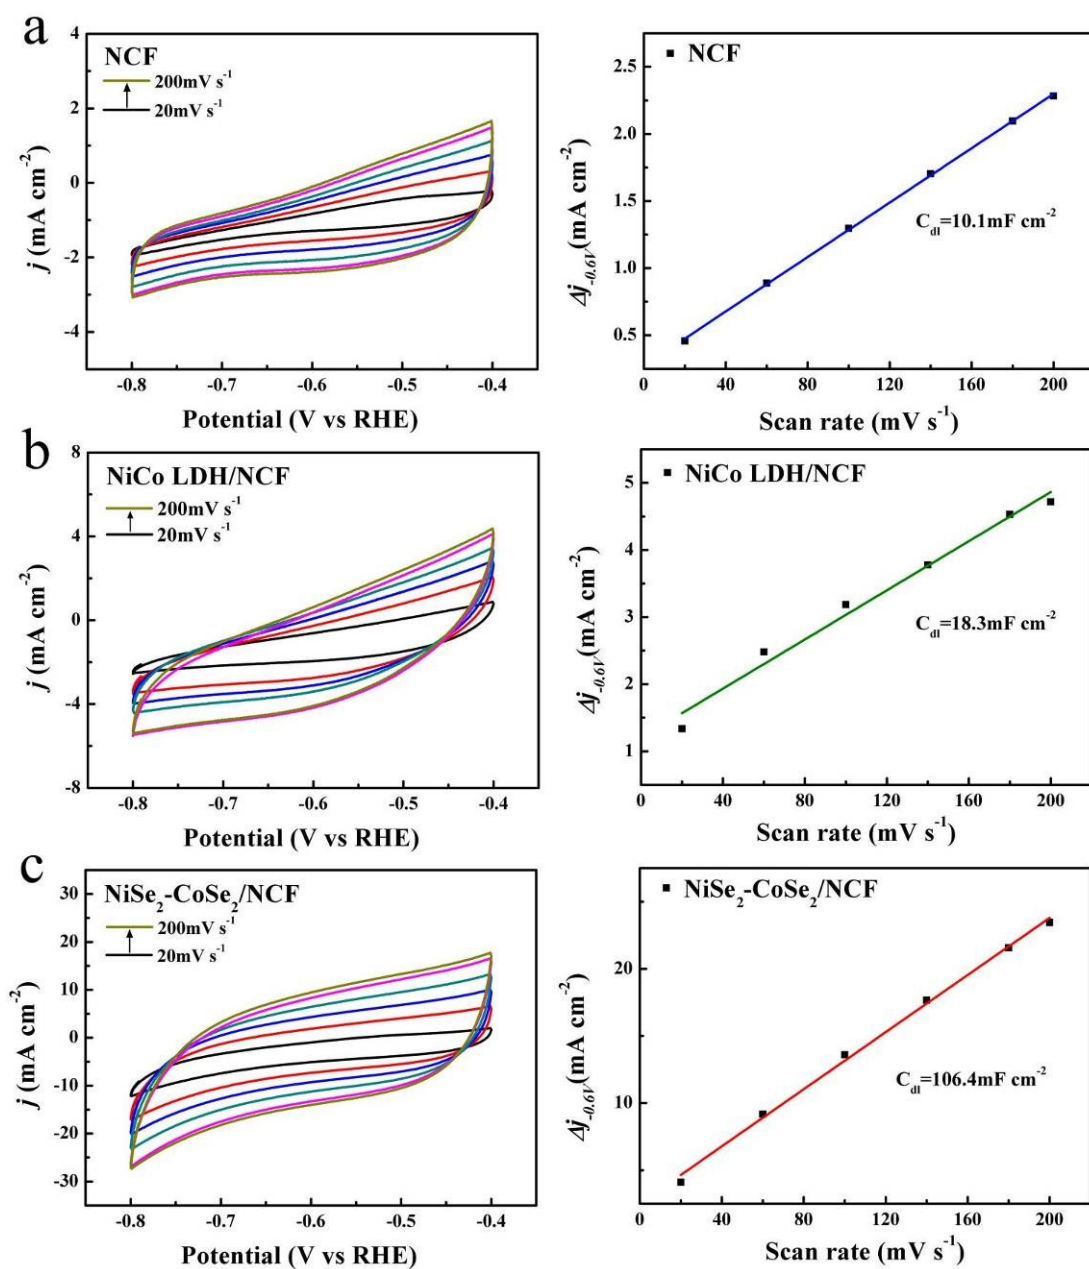

**Figure S18.** Cyclic voltammograms of the samples at a scan rate from 20 to 200  $\text{mV s}^{-1}$  in 1 M KOH (left) and the calculated  $C_{dl}$  (right), (a) NCF, (b) NiCo LDH/NCF, and (c) NiSe<sub>2</sub>-CoSe<sub>2</sub>/NCF.

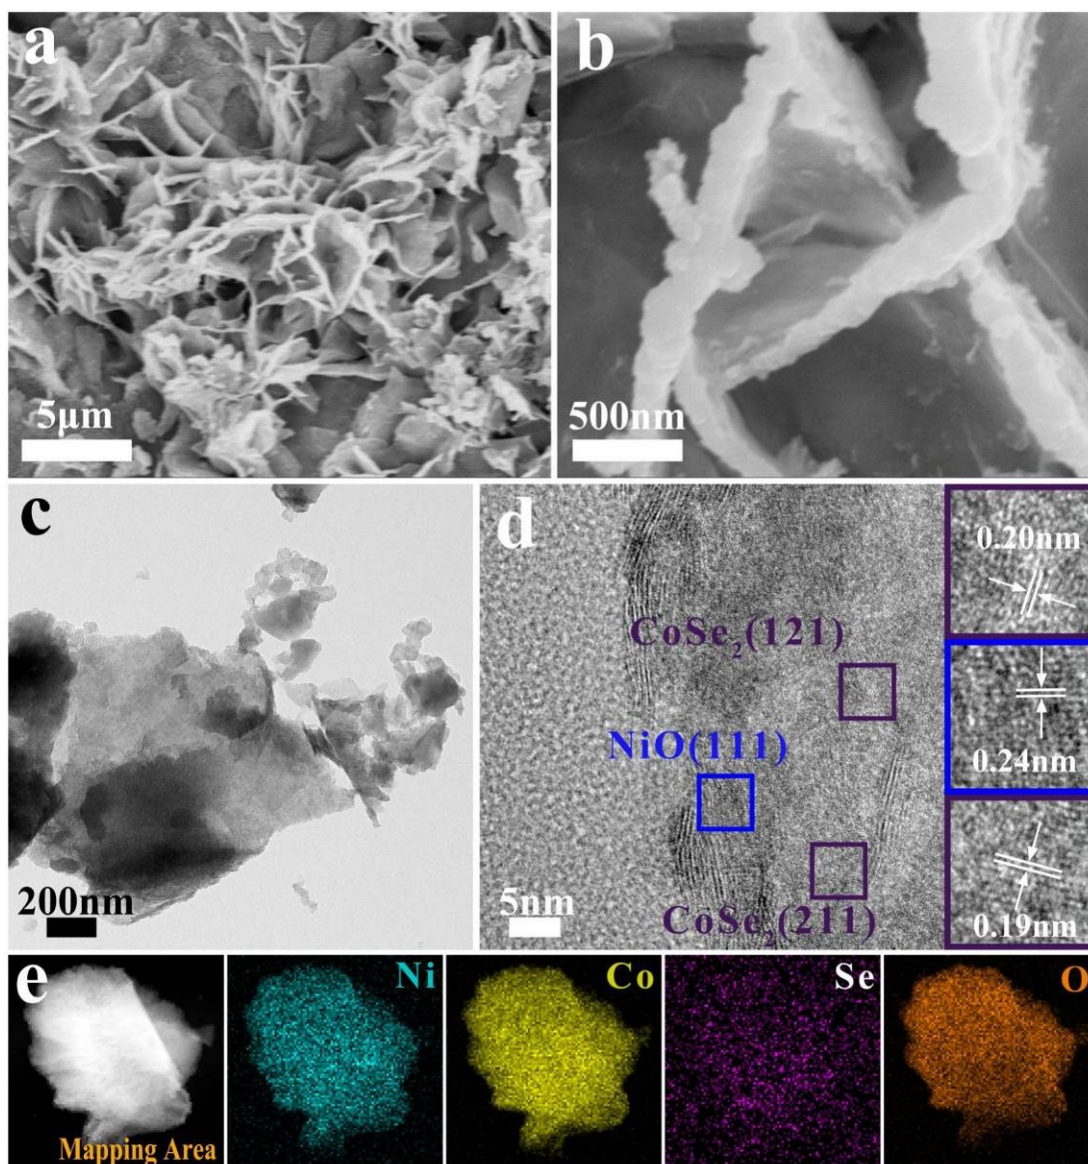

**Figure S19.** The morphology and crystal planes of NiSe<sub>2</sub>-CoSe<sub>2</sub>/NCF undergoing a OER process in 1 M KOH solution at  $j_{10}$  for 100 h. (a) Low and (b) High resolution SEM images, (c) Low resolution TEM image, (d) High resolution TEM image, and (e) The elements mapping of a single nanosheet.

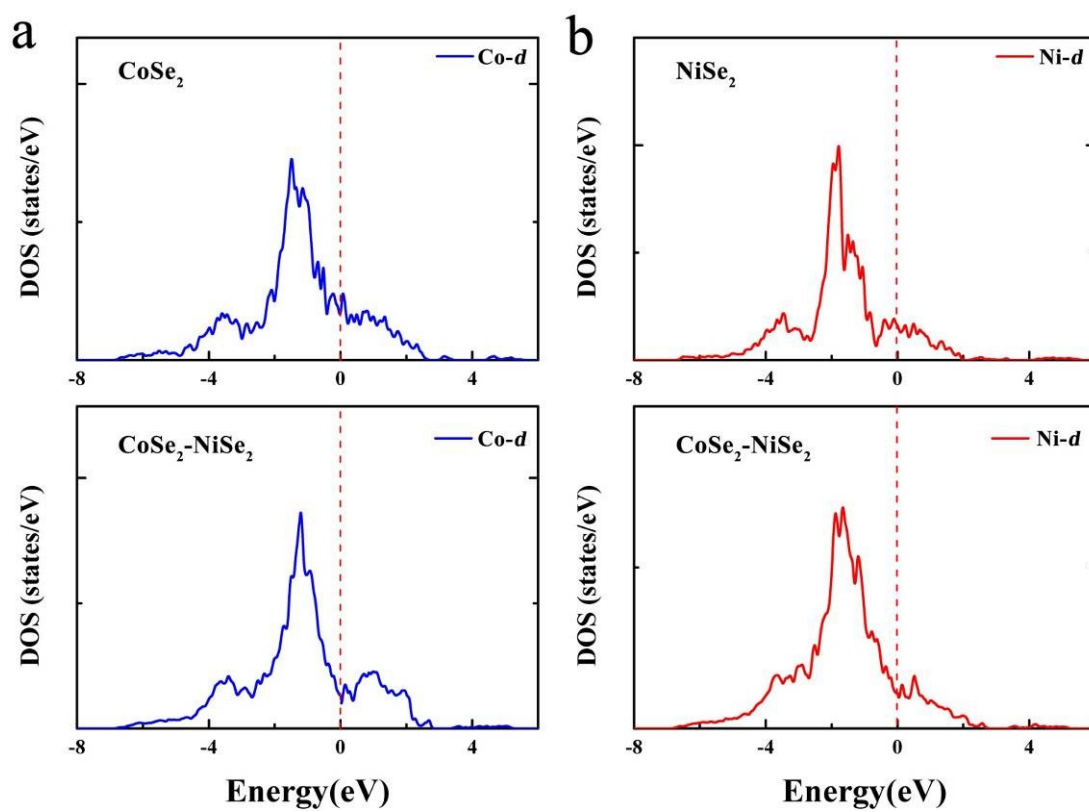

**Figure S20.** The partial density of state before and after forming the heterojunction. (a) d-band of Co atoms, and (b) d-band of Ni atoms.

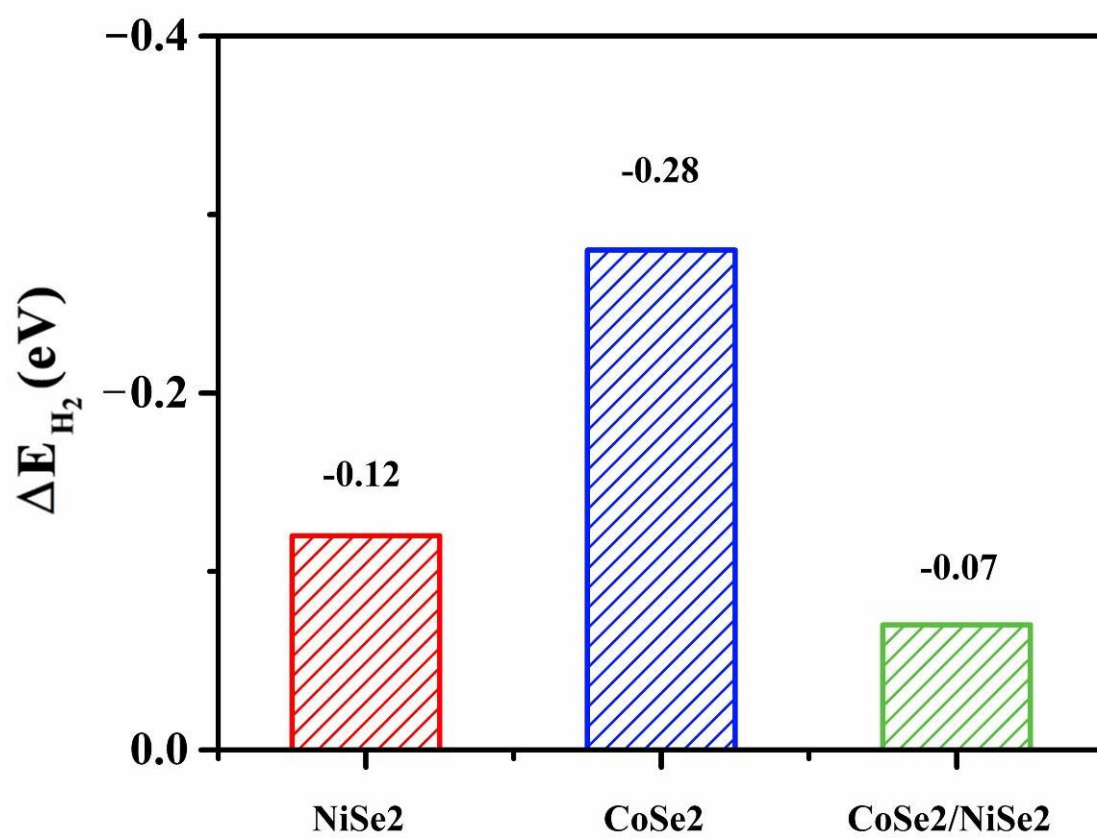

**Figure S21.** The comparison of the calculated H<sub>2</sub> adsorption energy ( $|\Delta E_{H_2}|$ ) for the pure CoSe<sub>2</sub>, NiSe<sub>2</sub> phases and heterointerface-forming NiSe<sub>2</sub>-CoSe<sub>2</sub> phase.

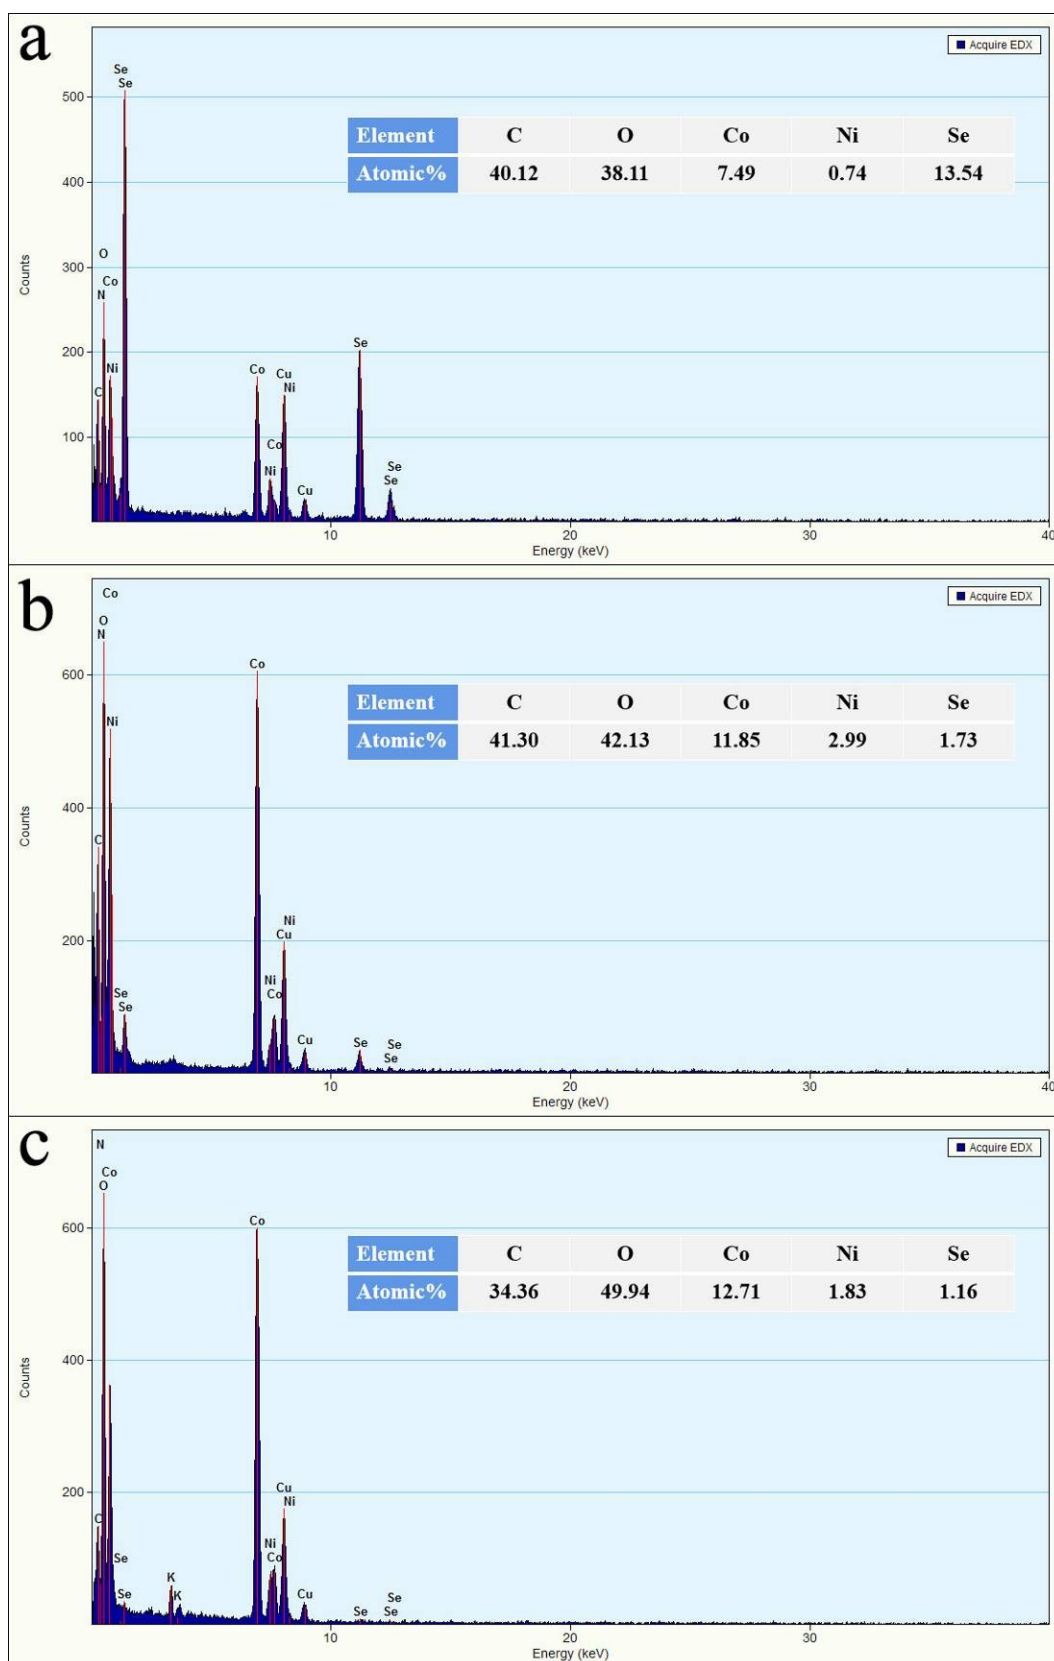

**Figure S22.** The TEM mode energy-dispersive X-ray (EDX) spectra of NiSe<sub>2</sub>-CoSe<sub>2</sub>/NCF catalyst undergoing electrocatalytic processes in 1 M KOH solution with  $j_{10}$  for 100 h. (a) The original, (b) After HER, and (c) After OER.

**Table S1.** The elements contents of different electrocatalysts.

| <b>Element</b>                               | <b>C1s</b> | <b>N1s</b> | <b>O1s</b> | <b>Ni2p</b> | <b>Co2p</b> | <b>Se3d</b> |
|----------------------------------------------|------------|------------|------------|-------------|-------------|-------------|
| <b>Atomic%</b>                               |            |            |            |             |             |             |
| <b>NCF</b>                                   | 54.62      | /          | 33.12      | 2.64        | 9.62        | /           |
| <b>NiCo LDH/NCF</b>                          | 34.26      | /          | 42.12      | 6.67        | 16.95       | /           |
| <b>NiSe<sub>2</sub>-CoSe<sub>2</sub>/NCF</b> | 15.84      | 9.58       | 42.04      | 3.42        | 17.38       | 11.74       |
| <b>After 100 h HER</b>                       | /          | 3.92       | 57.32      | 5.02        | 21.95       | 11.79       |
| <b>After 100 h OER</b>                       | /          | /          | 75.47      | 2.58        | 20.27       | 1.68        |



**Table S2.** Elemental composition of the NiSe<sub>2</sub>-CoSe<sub>2</sub>/NCF catalyst obtained from ICP-OES.

| <b>Element</b>                               | <b>Ni</b> | <b>Co</b> | <b>Se</b> |
|----------------------------------------------|-----------|-----------|-----------|
| <b>Atomic%</b>                               |           |           |           |
| <b>NiSe<sub>2</sub>-CoSe<sub>2</sub>/NCF</b> | 8.04      | 43.25     | 48.71     |

**Table S3.** The TOF, and Mass Activity (MA) for Pt/C/NCF, NiCo LDH/NCF and NiSe<sub>2</sub>-CoSe<sub>2</sub>/NCF corresponding to HER.

| <b>Sample</b>                                | <b>TOF (s<sup>-1</sup>@100mV)</b> | <b>MA (mA g<sup>-1</sup>@100mV)</b> |
|----------------------------------------------|-----------------------------------|-------------------------------------|
| <b>Pt/C/NCF</b>                              | 2.00×10 <sup>-4</sup>             | 3.29×10 <sup>3</sup>                |
| <b>NiCo LDH/NCF</b>                          | 5.88×10 <sup>-4</sup>             | 9.61×10 <sup>2</sup>                |
| <b>NiSe<sub>2</sub>-CoSe<sub>2</sub>/NCF</b> | 2.13×10 <sup>-3</sup>             | 1.92×10 <sup>3</sup>                |

**Table S4.** TOF for Pt/C/NCF, NiCo LDH/NCF and NiSe<sub>2</sub>-CoSe<sub>2</sub>/NCF at an overpotential of 40, 60, 80, 100 and 200 mV corresponding to HER.

| <b>TOF s<sup>-1</sup></b> | <b>Pt/C/NCF</b>       | <b>NiCo LDH/NCF</b>   | <b>NiSe<sub>2</sub>-CoSe<sub>2</sub>/NCF</b> |
|---------------------------|-----------------------|-----------------------|----------------------------------------------|
| <b>40 mV</b>              | 2.35×10 <sup>-5</sup> | 7.40×10 <sup>-5</sup> | 7.61×10 <sup>-4</sup>                        |
| <b>60 mV</b>              | 5.68×10 <sup>-5</sup> | 1.79×10 <sup>-4</sup> | 1.18×10 <sup>-3</sup>                        |
| <b>80 mV</b>              | 1.19×10 <sup>-4</sup> | 3.49×10 <sup>-4</sup> | 1.64×10 <sup>-3</sup>                        |
| <b>100 mV</b>             | 2.00×10 <sup>-4</sup> | 5.88×10 <sup>-4</sup> | 2.13×10 <sup>-3</sup>                        |
| <b>200 mV</b>             | 6.54×10 <sup>-4</sup> | 6.76×10 <sup>-3</sup> | 9.00×10 <sup>-3</sup>                        |

**Table S5.** Comparison of electrocatalytic HER activity of various non-precious catalysts in 1.0 M KOH electrolyte.

| Catalysts                                                      | $\eta$ (mV)<br>@<br>$J$ (mA cm <sup>-2</sup> ) | Tafel slope              | Stability (h)<br>@<br>$J$ (mA cm <sup>-2</sup> ) | References |
|----------------------------------------------------------------|------------------------------------------------|--------------------------|--------------------------------------------------|------------|
| <b>NiSe<sub>2</sub>-CoSe<sub>2</sub>/NCF</b>                   | 24@10                                          | 24 mV dec <sup>-1</sup>  | 100@10<br>100@100                                | This Work  |
|                                                                | 106@50                                         |                          |                                                  |            |
|                                                                | 156@100                                        |                          |                                                  |            |
|                                                                | 202@200                                        |                          |                                                  |            |
|                                                                | 231@300                                        |                          |                                                  |            |
|                                                                | 257@400                                        |                          |                                                  |            |
| <b>NiFe LDH@NiCoP/NF</b>                                       | 120@10                                         | 89 mV dec <sup>-1</sup>  | 100@10                                           | [S1]       |
|                                                                | 320@100                                        |                          |                                                  |            |
| <b>Se-(NiCo)S/OH</b>                                           | 103@10                                         | 88 mV dec <sup>-1</sup>  | 80@10                                            | [S2]       |
|                                                                | 204@100                                        |                          |                                                  |            |
| <b>Fe<sub>0.09</sub>Co<sub>0.13</sub>-NiSe<sub>2</sub>/CFC</b> | 92@10                                          | 89 mV dec <sup>-1</sup>  | 50@10                                            | [S3]       |
|                                                                | 215@100                                        |                          |                                                  |            |
|                                                                | 251@200                                        |                          |                                                  |            |
| <b>(Ni,Co)<sub>0.85</sub>Se NSAs</b>                           | 169@10                                         | 116 mV dec <sup>-1</sup> | 12@25                                            | [S4]       |
|                                                                | 284@100                                        |                          |                                                  |            |
|                                                                | 317@200                                        |                          |                                                  |            |
| <b>NiFeSe@NiSe O@CC</b>                                        | 62@10                                          | 49 mV dec <sup>-1</sup>  | 50@10                                            | [S5]       |
|                                                                | 231@100                                        |                          |                                                  |            |
|                                                                | 342@200                                        |                          |                                                  |            |
| <b>Co-B/Ni</b>                                                 | 70@10                                          | 68 mV dec <sup>-1</sup>  | 20@50                                            | [S6]       |
|                                                                | 345@200                                        |                          |                                                  |            |
|                                                                | 408@400                                        |                          |                                                  |            |
| <b>Ni-Co-P HNBS</b>                                            | 107@10                                         | 46 mV dec <sup>-1</sup>  | 20@100                                           | [S7]       |
|                                                                | 209@200                                        |                          |                                                  |            |
| <b>Fe<sub>7.4%</sub>-NiSe</b>                                  | 163@10                                         | 72 mV dec <sup>-1</sup>  | 22@20                                            | [S8]       |
|                                                                | 283@300                                        |                          |                                                  |            |
| <b>W- NiCoP/NF</b>                                             | 30@10                                          | 35 mV dec <sup>-1</sup>  | 24@10                                            | [S9]       |
|                                                                | 170@200                                        |                          |                                                  |            |
|                                                                | 211@400                                        |                          |                                                  |            |
| <b>NiCoP@NC NA/NF</b>                                          | 37@10                                          | 54 mV dec <sup>-1</sup>  | 22@10                                            | [S10]      |
|                                                                | 123@50                                         |                          |                                                  |            |
|                                                                | 205@100                                        |                          |                                                  |            |

|                                                            |                                         |                         |        |       |
|------------------------------------------------------------|-----------------------------------------|-------------------------|--------|-------|
| <b>CoP-Co<sub>2</sub>P@PC/PG NHs</b>                       | 39@10<br>68@50                          | 59 mV dec <sup>-1</sup> | 30@10  | [S11] |
| <b>WS<sub>2(1-x)</sub>Se<sub>2x</sub>/NiSe<sub>2</sub></b> | 88@10<br>129@50<br>146@100              | 47 mV dec <sup>-1</sup> | 10@120 | [S12] |
| <b>o-CoSe<sub>2</sub> P</b>                                | 104@10<br>177@100<br>193@200<br>205@300 | 69 mV dec <sup>-1</sup> | 20@100 | [S13] |
| <b>N-NiCoP/NF</b>                                          | 78@10<br>180@50<br>211@100              | 83 mV dec <sup>-1</sup> | 100@10 | [S14] |
| <b>NiCoP/NF</b>                                            | 32@10                                   | 37 mV dec <sup>-1</sup> | 24@10  | [S15] |
| <b>NiCo<sub>2</sub>O<sub>4</sub></b>                       | 110@10<br>245@100                       | 50 mV dec <sup>-1</sup> | 32@10  | [S16] |
| <b>Co<sub>1</sub>Mn<sub>1</sub>CH</b>                      | 180@10<br>281@50<br>328@100             | N/A                     | 10@10  | [S17] |

---

**Table S6.** The TOF, and Mass Activity (MA) for RuO<sub>2</sub>/NCF, NiCo LDH/NCF and NiSe<sub>2</sub>-CoSe<sub>2</sub>/NCF corresponding to OER.

| <b>Sample</b>                                | <b>TOF (s<sup>-1</sup>@300mV)</b> | <b>MA (mA g<sup>-1</sup>@300mV)</b> |
|----------------------------------------------|-----------------------------------|-------------------------------------|
| <b>RuO<sub>2</sub>/NCF</b>                   | 9.66×10 <sup>-2</sup>             | 8.14×10 <sup>2</sup>                |
| <b>NiCo LDH/NCF</b>                          | 1.15×10 <sup>-1</sup>             | 4.61×10 <sup>2</sup>                |
| <b>NiSe<sub>2</sub>-CoSe<sub>2</sub>/NCF</b> | 4.55×10 <sup>-1</sup>             | 5.28×10 <sup>2</sup>                |

**Table S7.** TOF for RuO<sub>2</sub>/NCF, NiCo LDH/NCF and NiSe<sub>2</sub>-CoSe<sub>2</sub>/NCF at an overpotential of 250, 275, 300, and 325 mV corresponding to OER.

| TOF s <sup>-1</sup> | RuO <sub>2</sub> /NCF | NiCo LDH/NCF          | NiSe <sub>2</sub> -CoSe <sub>2</sub> /NCF |
|---------------------|-----------------------|-----------------------|-------------------------------------------|
| 250 mV              | 4.45×10 <sup>-2</sup> | 1.11×10 <sup>-1</sup> | 1.20×10 <sup>-1</sup>                     |
| 275 mV              | 6.93×10 <sup>-2</sup> | 1.05×10 <sup>-1</sup> | 1.77×10 <sup>-1</sup>                     |
| 300 mV              | 9.66×10 <sup>-2</sup> | 1.15×10 <sup>-1</sup> | 4.55×10 <sup>-1</sup>                     |
| 325 mV              | 1.32×10 <sup>-1</sup> | 1.77×10 <sup>-1</sup> | 1.60                                      |

**Table S8.** Comparison of electrocatalytic OER activity of various non-precious catalysts in 1.0 M KOH electrolyte.

| Catalysts                                          | $\eta$ (mV)<br>@<br>$J$ (mA cm <sup>-2</sup> ) | Tafel slope             | Stability (h)<br>@<br>$J$ (mA cm <sup>-2</sup> ) | References |
|----------------------------------------------------|------------------------------------------------|-------------------------|--------------------------------------------------|------------|
| NiSe <sub>2</sub> -CoSe <sub>2</sub> /NCF          | 250@10                                         | 48 mV dec <sup>-1</sup> | 100@10<br>100@100                                | This Work  |
|                                                    | 305@50                                         |                         |                                                  |            |
|                                                    | 318@100                                        |                         |                                                  |            |
|                                                    | 332@200                                        |                         |                                                  |            |
|                                                    | 337@300                                        |                         |                                                  |            |
|                                                    | 346@400                                        |                         |                                                  |            |
| NiFe LDH@NiCoP/NF                                  | 220@10                                         | 49 mV dec <sup>-1</sup> | 100@10                                           | [S1]       |
|                                                    | 345@100                                        |                         |                                                  |            |
|                                                    | 459@200                                        |                         |                                                  |            |
|                                                    | 560@300                                        |                         |                                                  |            |
| Se-(NiCo)S/OH                                      | 155@10                                         | 34 mV dec <sup>-1</sup> | 73@20                                            | [S2]       |
|                                                    | 242@100                                        |                         |                                                  |            |
|                                                    | 296@200                                        |                         |                                                  |            |
| (Ni,Co) <sub>0.85</sub> Se NSAs                    | 287@20                                         | 87 mV dec <sup>-1</sup> | 12@72                                            | [S4]       |
|                                                    | 398@200                                        |                         |                                                  |            |
|                                                    | 470@400                                        |                         |                                                  |            |
| Co-B/Ni                                            | 140@10                                         | 98 mV dec <sup>-1</sup> | 20@100                                           | [S6]       |
|                                                    | 412@100                                        |                         |                                                  |            |
|                                                    | 524@200                                        |                         |                                                  |            |
| Fe <sub>7.4%</sub> -NiSe                           | 231@50                                         | 43 mV dec <sup>-1</sup> | 22@30                                            | [S8]       |
|                                                    | 257@300                                        |                         |                                                  |            |
| N-NiCoP/NF                                         | 225@10                                         | 67 mV dec <sup>-1</sup> | 100@10                                           | [S14]      |
|                                                    | 361@100                                        |                         |                                                  |            |
| NiCoP/NF                                           | 280@10                                         | 87 mV dec <sup>-1</sup> | 24@10                                            | [S15]      |
|                                                    | 300@16                                         |                         |                                                  |            |
| NiCo <sub>2</sub> O <sub>4</sub>                   | 290@10                                         | 53 mV dec <sup>-1</sup> | 32@10                                            | [S16]      |
|                                                    | 330@50                                         |                         |                                                  |            |
|                                                    | 360@100                                        |                         |                                                  |            |
| Co <sub>1</sub> Mn <sub>1</sub> CH                 | 322@50                                         | N/A                     | 18@50                                            | [S17]      |
|                                                    | 349@100                                        |                         |                                                  |            |
| NiCo-nitrides/NiCo <sub>2</sub> O <sub>4</sub> /GF | 183@10                                         | 56 mV dec <sup>-1</sup> | 40@10                                            | [S18]      |
|                                                    | 435@100                                        |                         |                                                  |            |
|                                                    | 538@200                                        |                         |                                                  |            |



|                                                              |         |                         |          |       |
|--------------------------------------------------------------|---------|-------------------------|----------|-------|
| <b>Ni<sub>5</sub>Co<sub>3</sub>Mo-OH</b>                     | 280@50  | 57 mV dec <sup>-1</sup> | 100@100  | [S19] |
|                                                              | 290@100 |                         |          |       |
|                                                              | 301@200 |                         |          |       |
|                                                              | 320@300 |                         |          |       |
| <b>Ni<sub>0.33</sub>Co<sub>0.67</sub>MoS<sub>4</sub>/CFC</b> | 283@10  | 69 mV dec <sup>-1</sup> | 10@10    | [S20] |
|                                                              | 344@100 |                         |          |       |
| <b>FeOOH(Se)/IF</b>                                          | 287@10  | 54 mV dec <sup>-1</sup> | 15@10    | [S21] |
|                                                              | 363@100 |                         |          |       |
|                                                              | 405@200 |                         |          |       |
|                                                              | 449@400 |                         |          |       |
| <b>LSC&amp;MoSe<sub>2</sub></b>                              | 370@10  | 77 mV dec <sup>-1</sup> | 1000@100 | [S22] |
|                                                              | 487@100 |                         |          |       |
| <b>CoSe<sub>1.26</sub>P<sub>1.42</sub></b>                   | 255@10  | 87 mV dec <sup>-1</sup> | 15@10    | [S23] |
|                                                              | 333@50  |                         |          |       |
|                                                              | 372@100 |                         |          |       |
| <b>5% Fe-NiSe<sub>2</sub></b>                                | 231@10  | 83 mV dec <sup>-1</sup> | 20@15    | [S24] |
|                                                              | 368@100 |                         |          |       |
|                                                              | 241@200 |                         |          |       |
| <b>two-tiered NiSe</b>                                       | 290@10  | 77 mV dec <sup>-1</sup> | 30@10    | [S25] |
|                                                              | 354@50  |                         |          |       |
|                                                              | 421@100 |                         |          |       |

**Table S9.** Comparison of overall water splitting performance of this work with recently reported electrocatalysts in 1 M KOH solution at the current density of 50, 100 and 200 mA cm<sup>-2</sup>.

| Catalysts                                       | Cell voltages (V)                    | References |
|-------------------------------------------------|--------------------------------------|------------|
|                                                 | @<br><i>J</i> (mA cm <sup>-2</sup> ) |            |
| NiSe <sub>2</sub> -CoSe <sub>2</sub> /NCF       | 1.63@50                              | This work  |
|                                                 | 1.69@100                             |            |
|                                                 | 1.79@200                             |            |
| NiFe LDH@NiCoP/NF                               | 1.76@50                              | [S1]       |
|                                                 | 1.91@100                             |            |
| Se-(NiCo)S/OH                                   | 1.86@50                              | [S2]       |
|                                                 | 2.04@100                             |            |
| (Ni,Co) <sub>0.85</sub> Se NSAs                 | 1.88@50                              | [S4]       |
|                                                 | 1.98@80                              |            |
| NiFeSe@NiSe O@CC                                | 1.72@50                              | [S5]       |
|                                                 | 1.86@100                             |            |
| Fe <sub>7.4%</sub> -NiSe                        | 1.68@50                              | [S8]       |
|                                                 | 1.73@100                             |            |
| N-NiCoP/NF                                      | 1.56@10                              | [S14]      |
|                                                 | 1.82@100                             |            |
| NiCoP/NF                                        | 1.65@50                              | [S15]      |
|                                                 | 1.81@100                             |            |
| NiCo <sub>2</sub> O <sub>4</sub>                | 1.65@10                              | [S16]      |
| Co <sub>1</sub> Mn <sub>1</sub> CH              | 1.83@50                              | [S17]      |
|                                                 | 1.98@100                             |            |
| Co-Ni-Se/C/NF                                   | 1.76@50                              | [S26]      |
|                                                 | 1.87@100                             |            |
| Co-B@CoO                                        | 1.67@50                              | [S27]      |
| FeCoNi-LTH/NiCo <sub>2</sub> O <sub>4</sub> /CC | 1.65@50                              | [S28]      |
| Ru-HPC  P-RuO <sub>2</sub>                      | 1.64@50                              | [S29]      |
|                                                 | 1.69@100                             |            |
| NiCo <sub>2</sub> S <sub>4</sub> -2             | 1.80@50                              | [S30]      |
|                                                 | 1.96@100                             |            |

## References

- (S1) H. Zhang, X. Li, A. Hähnel, V. Naumann, C. Lin, S. Azimi, S. L. Schweizer, A. W. Maijenburg, R. B. Wehrspohn, Bifunctional heterostructure assembly of NiFe LDH nanosheets on NiCoP nanowires for highly efficient and stable overall water splitting, *Advanced Functional Materials* **2018**, *28*, 1706847.
- (S2) C. Hu, L. Zhang, Z. J. Zhao, A. Li, X. Chang, J. Gong, Synergism of geometric construction and electronic regulation: 3D Se-(NiCo)S<sub>x</sub>/(OH)<sub>x</sub> nanosheets for highly efficient overall water splitting, *Adv. Mater.* **2018**, *30*, 1705538.
- (S3) Y. Sun, K. Xu, Z. Wei, H. Li, T. Zhang, X. Li, W. Cai, J. Ma, H. J. Fan, Y. Li, Strong electronic interaction in dual-cation-incorporated NiSe<sub>2</sub> nanosheets with lattice distortion for highly efficient overall water splitting, *Adv. Mater.* **2018**, *30*, 1802121.
- (S4) K. Xiao, L. Zhou, M. Shao, M. Wei, Fabrication of (Ni,Co)<sub>0.85</sub>Se nanosheet arrays derived from layered double hydroxides toward largely enhanced overall water splitting, *Journal of Materials Chemistry A* **2018**, *6*, 7585-7591.
- (S5) G. Yilmaz, C. F. Tan, Y. F. Lim, G. W. Ho, Pseudomorphic transformation of interpenetrated prussian blue analogs into defective nickel iron selenides for enhanced electrochemical and photo-electrochemical water splitting, *Advanced Energy Materials* **2019**, *9*, 1802983.
- (S6) W. Hao, R. Wu, R. Zhang, Y. Ha, Z. Chen, L. Wang, Y. Yang, X. Ma, D. Sun, F. Fang, Y. Guo, Electroless plating of highly efficient bifunctional boride-based electrodes toward practical overall water splitting, *Advanced Energy Materials* **2018**, *8*, 1801372.
- (S7) E. Hu, Y. Feng, J. Nai, D. Zhao, Y. Hu, X. W. D. Lou, Construction of hierarchical Ni-Co-P hollow nanobricks with oriented nanosheets for efficient overall water splitting, *Energy & Environmental Science* **2018**, *11*, 872-880.
- (S8) Z. Zou, X. Wang, J. Huang, Z. Wu, F. Gao, An Fe-doped nickel selenide nanorod/nanosheet hierarchical array for efficient overall water splitting, *Journal of Materials Chemistry A* **2019**, *7*, 2233-2241.

- (S9) S. Lu, L. Zhang, Y. Dong, J. Zhang, X. Yan, D. Sun, X. Shang, J. Chi, Y. Chai, B. Dong, Tungsten-doped Ni-Co phosphides with multiple catalytic sites as efficient electrocatalysts for overall water splitting, *Journal of Materials Chemistry A* **2019**, *7*, 16859-16866.
- (S10) B. Cao, Y. Cheng, M. Hu, P. Jing, Z. Ma, B. Liu, R. Gao, J. Zhang, Efficient and durable 3D self-supported nitrogen-doped carbon-coupled nickel/cobalt phosphide electrodes: stoichiometric ratio regulated phase- and morphology dependent overall water splitting performance, *Advanced Functional Materials* **2019**, *29*, 1906316.
- (S11) J. Yang, D. Guo, S. Zhao, Y. Lin, R. Yang, D. Xu, N. Shi, X. Zhang, L. Lu, Y. Q. Lan, J. Bao, M. Han, Cobalt phosphides nanocrystals encapsulated by p-doped carbon and married with p-doped graphene for overall water splitting, *Small* **2019**, *15*, 1804546.
- (S12) H. Zhou, F. Yu, J. Sun, H. Zhu, I. K. Mishra, S. Chen, Z. Ren, Highly efficient hydrogen evolution from edge-oriented  $WS_{2(1-x)}Se_{2x}$  particles on three-dimensional porous  $NiSe_2$  foam, *Nano Lett* **2016**, *16*, 7604 -7609.
- (S13) Y. R. Zheng, P. Wu, M. R. Gao, X. L. Zhang, F. Y. Gao, H. X. Ju, R. Wu, Q. Gao, R. You, W. X. Huang, S. J. Liu, S. W. Hu, J. Zhu, Z. Li, S. H. Yu, Doping-induced structural phase transition in cobalt diselenide enables enhanced hydrogen evolution catalysis, *Nature communications* **2018**, *9*, 2533.
- (S14) R. Zhang, J. Huang, G. Chen, W. Chen, C. Song, C. Li, K. Ostrikov, In situ engineering bi-metallic phospho-nitride bi-functional electrocatalysts for overall water splitting, *Applied Catalysis B: Environmental* **2019**, *254*, 414-423.
- (S15) H. F. Liang, A. N. Gandi, D. H. Anjum, X. B. Wang, U. Schwingenschlögl, H. S. N. Alshareef, Plasma-Assisted Synthesis of NiCoP for Efficient Overall Water Splitting, *Nano Lett* **2016**, *16*, 7718-7725.
- (S16) X. H. Gao, H. X. Zhang, Q. G. Li, X. G. Yu, Z. L. Hong, X. W. Zhang, C. D. Liang, Z. Lin, Hierarchical  $NiCo_2O_4$  Hollow Microcuboids as Bifunctional Electrocatalysts for Overall Water-Splitting, *Angew. Chem. Int. Ed* **2016**, *55*, 6290-6294.
- (S17) T. Tang, W. J. Jiang, S. Niu, N. Liu, H. Luo, Y. Y. Chen, S. F. Jin, F. Gao, L. J. Wan, J. S. Hu,

Electronic and Morphological Dual Modulation of Cobalt Carbonate Hydroxides by Mn Doping toward Highly Efficient and Stable Bifunctional Electrocatalysts for Overall Water Splitting, *J. Am. Chem. Soc.* **2017**, *139*, 8320-8328.

(S18) Z. Liu, H. Tan, D. Liu, X. Liu, J. Xin, J. Xie, M. Zhao, L. Song, L. Dai, H. Liu, Promotion of overall water splitting activity over a wide pH range by interfacial electrical effects of metallic NiCo-nitrides nanoparticle/NiCo<sub>2</sub>O<sub>4</sub> nanoflake/graphite fibers, *Advanced Science* **2019**, *6*, 1801829.

(S19) S. Hao, L. Chen, C. Yu, B. Yang, Z. Li, Y. Hou, L. Lei, X. Zhang, NiCoMo hydroxide nanosheet arrays synthesized via chloride corrosion for overall water splitting, *ACS Energy Letters* **2019**, *4*, 952-959.

(S20) L. Hang, T. Zhang, Y. Sun, D. Men, X. Lyu, Q. Zhang, W. Cai, Y. Li, Ni<sub>0.33</sub>Co<sub>0.67</sub>MoS<sub>4</sub> nanosheets as a bifunctional electrolytic water catalyst for overall water splitting, *Journal of Materials Chemistry A* **2018**, *6*, 19555-19562.

(S21) S. Niu, W. J. Jiang, Z. Wei, T. Tang, J. Ma, J. S. Hu, L. J. Wan, Se-doping activates FeOOH for cost-effective and efficient electrochemical water oxidation, *Journal of the American Chemical Society* **2019**, *141*, 7005-7013.

(S22) N. K. Oh, C. Kim, J. Lee, O. Kwon, Y. Choi, G. Y. Jung, H. Y. Lim, S. K. Kwak, G. Kim, H. Park, In-situ local phase-transitioned MoSe<sub>2</sub> in La<sub>0.5</sub>Sr<sub>0.5</sub>CoO<sub>3-δ</sub> heterostructure and stable overall water electrolysis over 1000 hours, *Nature communications* **2019**, *10*, 1723.

(S23) Y. Zhu, H. C. Chen, C. S. Hsu, T. S. Lin, C. J. Chang, S. C. Chang, L. D. Tsai, H. M. Chen, Operando unraveling the structural/chemical stability of P substituted CoSe<sub>2</sub> electrocatalysts toward hydrogen/oxygen evolution reactions in alkaline electrolyte, *ACS Energy Letters* **2019**, *4*, 987-994.

(S24) L. Lin, M. Chen, L. Wu, Hierarchical iron-doped nickel diselenide hollow spheres for efficient oxygen evolution electrocatalysis, *ACS Applied Energy Materials* **2019**, *2*, 4737-4744.

(S25) H. Wu, X. Lu, G. Zheng, G. W. Ho, Topotactic engineering of ultrathin 2D nonlayered nickel selenides for full water electrolysis, *Advanced Energy Materials* **2018**, *8*, 1702704.

- (S26) F. Ming, H. Liang, H. Shi, X. Xu, G. Mei, Z. Wang, MOF-derived Co-doped nickel selenide/C electrocatalysts supported on Ni foam for overall water splitting, *Journal of Materials Chemistry A* **2016**, *4*, 15148-15155.
- (S27) W. Lu, T. Liu, L. Xie, C. Tang, D. Liu, S. Hao, F. Qu, G. Du, Y. Ma, A. M. Asiri, In situ derived Co-B nanoarray: a high-efficiency and durable 3D bifunctional electrocatalyst for overall alkaline water splitting, *Small* **2017**, *13*, 1700805.
- (S28) Y. Liu, Y. Bai, Y. Han, Z. Yu, S. Zhang, G. Wang, J. Wei, Q. Wu, K. Sun, Self-supported hierarchical FeCoNi-LTH/NiCo<sub>2</sub>O<sub>4</sub>/CC electrodes with enhanced bifunctional performance for efficient overall water splitting, *ACS Applied Materials & Interfaces* **2017**, *9*, 36917-36926.
- (S29) T. Qiu, Z. Liang, W. Guo, S. Gao, C. Qu, H. Tabassum, H. Zhang, B. Zhu, R. Zou, Y. Shao-Horn, Highly exposed ruthenium-based electrocatalysts from bimetallic metal-organic frameworks for overall water splitting, *Nano Energy* **2019**, *58*, 1-10.
- (S30) Z. Kang, H. Guo, J. Wu, X. Sun, Z. Zhang, Q. Liao, S. Zhang, H. Si, P. Wu, L. Wang, Y. Zhang, Engineering an earth-abundant element-based bifunctional electrocatalyst for highly efficient and durable overall water splitting, *Advanced Functional Materials* **2019**, *29*, 1807031.
